# Supplementary material
Source: PubMed Central journal article supplement (PMC3129412)
Supplement: NIHMS268016-supplement-01.pdf [file NIHMS268016-supplement-01.pdf]

**Table S1. Clinical Characteristics of the 11 Subjects with Major Depressive Disorder Included in PET Study**

| Clinical Characteristic    | Category, Unit                   | Value                 |
|----------------------------|----------------------------------|-----------------------|
| BDI score                  | Mean (SD), range                 | 25.3 (8.0), 13 to 35  |
| BAI score                  | Mean (SD), range                 | 18.6 (10.5), 6 to 37  |
| Age at onset               | Mean (SD), range, in years       | 26.1 (13.9), 17 to 42 |
| Episode duration           | Mean (SD), range, in months      | 59.8 (48.1), 9 to 138 |
| Total illness duration     | Mean (SD), range, in years       | 14.73 (11.3), 3 to 42 |
| Course of Major Depression | Single MDE (N)                   | 1                     |
|                            | 2 or 3 MDEs (N)                  | 4                     |
|                            | >3 MDEs (N)                      | 4                     |
|                            | Chronic course                   | 2                     |
| Time medication-free       | Mean (SD), range, in months      | 15.3 (13.2), 1 to 39  |
|                            | Never medicated (N)              | 4                     |
| Comorbid diagnoses         | Generalized anxiety disorder (N) | 1                     |
|                            | Panic disorder (N)               | 1                     |
|                            | Social phobia (N)                | 1                     |
| History of suicidality     | Suicide attempt/s (N)            | 1                     |
| Depression subtypes        | Melancholic (N)                  | 1                     |
|                            | Atypical (N)                     | 0                     |
| Family history             | Major depressive disorder (N)    | 6                     |
|                            | Bipolar disorders (N)            | 1                     |
|                            | Anxiety disorders (N)            | 1                     |
|                            | Alcohol use disorders (N)        | 6                     |

BDI=Beck Depression Inventory, BAI=Beck Anxiety Inventory, SD=standard deviation

**Table S2. Summary of Clinical Characteristics of Subjects Included in Postmortem Study**

| Clinical Characteristic         | Healthy Controls (n=15)                     | Major Depression (n=15)                                                       |
|---------------------------------|---------------------------------------------|-------------------------------------------------------------------------------|
| Age*                            | 49 (14.9) years                             | 52 (14.5) years                                                               |
| Postmortem interval*            | 17 (5.7) hours                              | 23 (4.8) hours                                                                |
| pH*                             | 6.68 (0.31)                                 | 6.52 (0.27)                                                                   |
| Gender (female/male)            | 3/12                                        | 3/12                                                                          |
| Time in freezer*                | 141 (24) months                             | 137 (41) months                                                               |
| Medication history <sup>a</sup> | none                                        | n=4<br><br>(sertraline, n=2; fluoxetine, n=1;<br>imipramine, n=1)             |
| Comorbid diagnosis              | History of alcohol abuse,<br>n=3            | Alcohol abuse, n=2<br><br>History of alcohol abuse, n=2<br><br>Dysthymia, n=1 |
| Smoking                         | Smokers, n=5<br><br>History of smoking, n=2 | Smokers, n=5                                                                  |
| Suicide                         | none                                        | n=11                                                                          |

\* Mean (SD); <sup>a</sup> prescriptions for antidepressants within 4 weeks prior to death; none of the 15 depressed subjects had antidepressants present in their postmortem toxicology screening.

**Table S3. Clinical Characteristics of Individual Subjects Included in Postmortem Study**

| <b>Healthy Controls<br/>(pair no.)</b> | <b>Age</b> | <b>Sex</b> | <b>PMI</b> | <b>Brain<br/>pH</b> | <b>Toxicology</b>              | <b>Cause of death</b>       |
|----------------------------------------|------------|------------|------------|---------------------|--------------------------------|-----------------------------|
| 1                                      | 30         | M          | 19         | 6.98                | Clean                          | Heart disease               |
| 2                                      | 33         | M          | 23         | 6.86                | Clean                          | Heart disease               |
| 3                                      | 27         | F          | 15         | 7.01                | Clean                          | Heart disease               |
| 4                                      | 37         | F          | 13         | 5.93                | Clean                          | Viral myocarditis           |
| 5                                      | 51         | F          | 22         | 6.30                | Clean                          | Heart disease               |
| 6                                      | 46         | M          | 11         | 6.95                | Clean                          | Heart disease               |
| 7                                      | 54         | M          | 17         | 6.87                | Brompheniramine                | Heart disease               |
| 8                                      | 69         | M          | 26         | 6.70                | Clean                          | Heart disease               |
| 9                                      | 70         | M          | 20         | 6.81                | Clean                          | Heart disease               |
| 10                                     | 74         | M          | 21         | 6.62                | Clean                          | Abdominal aortic aneurysm   |
| 11                                     | 59         | M          | 6          | 6.79                | Lidocaine                      | Heart disease               |
| 12                                     | 34         | M          | 24         | 6.61                | Ethanol                        | Thrombophlebitis            |
| 13                                     | 54         | M          | 19         | 6.52                | Lidocaine                      | Heart disease               |
| 14*                                    | 52         | M          | 17         | 6.28                | Clean                          | Heart disease               |
| 15*                                    | 48         | M          | 9          | 6.98                | Clean                          | Heart disease               |
| <b>Major Depression<br/>(pair no.)</b> |            |            |            |                     |                                |                             |
| 1                                      | 41         | M          | 19         | 6.24                | Chlorpheniramine               | Heart disease               |
| 2                                      | 30         | M          | 18         | 6.91                | Ethanol                        | Suicide (gun shot to chest) |
| 3                                      | 34         | F          | 24         | 6.27                | Ethanol, CO, alprazolam        | Suicide (CO poisoning)      |
| 4                                      | 40         | F          | 25         | 6.32                | Morphine, codeine, hydrocodone | Heart disease               |
| 5                                      | 50         | F          | 28         | 6.47                | Dextromethorphan               | Cardiovascular disease      |
| 6                                      | 46         | M          | 17         | 6.26                | Clean                          | Homicide                    |
| 7                                      | 54         | M          | 23         | 6.24                | Phenobarbital, phenytoin, CO   | Suicide (CO poisoning)      |
| 8                                      | 64         | M          | 26         | 6.85                | Ethanol                        | Suicide (gun shot to head)  |
| 9                                      | 74         | M          | 25         | 6.67                | Diazepam                       | Suicide (gun shot to head)  |
| 10                                     | 81         | M          | 33         | 6.78                | Clean                          | Suicide (drowning)          |
| 11                                     | 60         | M          | 20         | 6.31                | Ethanol                        | Suicide (gun shot to chest) |
| 12                                     | 42         | M          | 20         | 6.80                | Clean                          | Suicide (gun shot to chest) |
| 13                                     | 52         | M          | 17         | 6.48                | CO                             | Suicide (CO poisoning)      |
| 14*                                    | 48         | M          | 21         | 6.90                | Flurazepam                     | Suicide (gun shot to chest) |
| 15*                                    | 65         | M          | 30         | 6.24                | Codeine                        | Suicide (gun shot to chest) |

M, male; F, female; PMI, postmortem interval; CO, carbon monoxide. \* subjects not included in mGluR1 study

**Table S4. Brain regions with negative correlations between clinical symptoms and [<sup>11</sup>C]ABP688 DVR in subjects with major depressive disorder (N=11)**

| <b>Brain Regions</b>                                        | <b>x y z<br/>coordinates<sup>b</sup></b> | <b>t-values</b>   |
|-------------------------------------------------------------|------------------------------------------|-------------------|
| <b>Negative Correlations with Beck Depression Inventory</b> |                                          |                   |
| R hippocampal formation                                     | 22, 38, 7                                | 9.22 <sup>a</sup> |
| L hippocampal formation                                     | -26, -39, 6                              | 4.41              |
| <b>Negative Correlations with Beck Anxiety Inventory</b>    |                                          |                   |
| R thalamus                                                  | 14, -13, 3                               | 5.53              |
| L thalamus                                                  | -10, -19, 1                              | 5.24              |
| R medial orbital cortex (Brodmann's area 11)                | 26, 36, -22                              | 4.81              |
| R frontal polar cortex (Brodmann's area 10)                 | 34, 62, -10                              | 4.77              |
| L lateral orbital cortex (Brodmann's area 11/47)            | -46, 34, -15                             | 4.58              |
| L mid-cingulate cortex                                      | -22, -31, 44                             | 4.43              |

All results were significant at  $p_{\text{uncorrected}} < 0.001$ .

<sup>a</sup> Cluster-level, corrected p value = 0.029 after applying the cluster test for multiple testing

<sup>b</sup> Coordinates correspond to the stereotaxic array of Talairach and Tournoux (1988)
