# Supplementary material
Source: PubMed Central journal article supplement (PMC3129412)

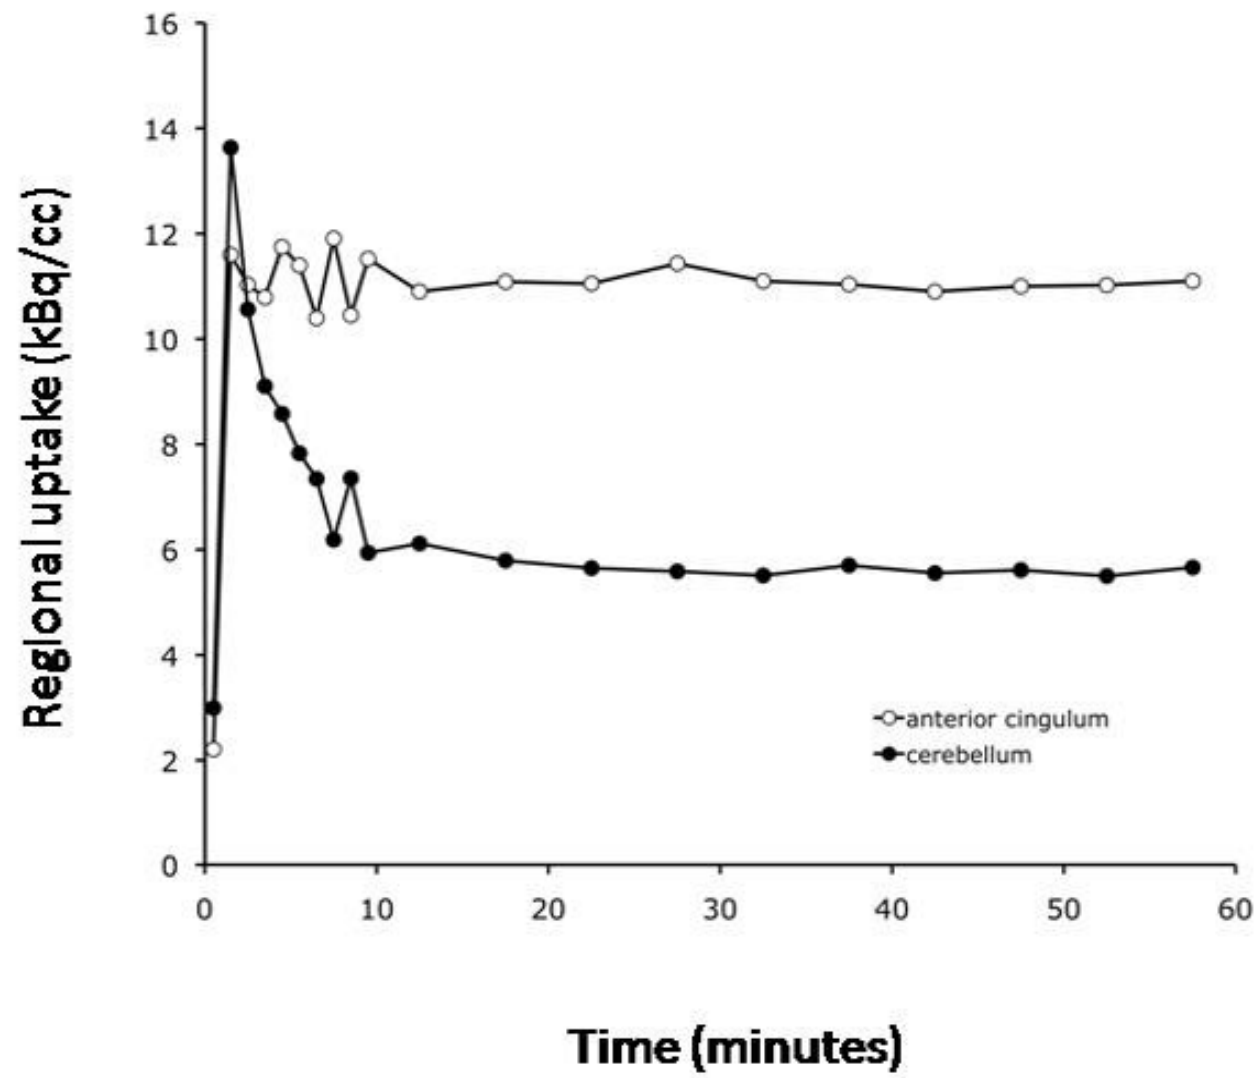

mGluR5 Vnorm

1.4  
1.35  
1.3  
1.25  
1.2  
1.15  
1.1

▲ Drug Naïve ● Comorbid Anxiety Disorder

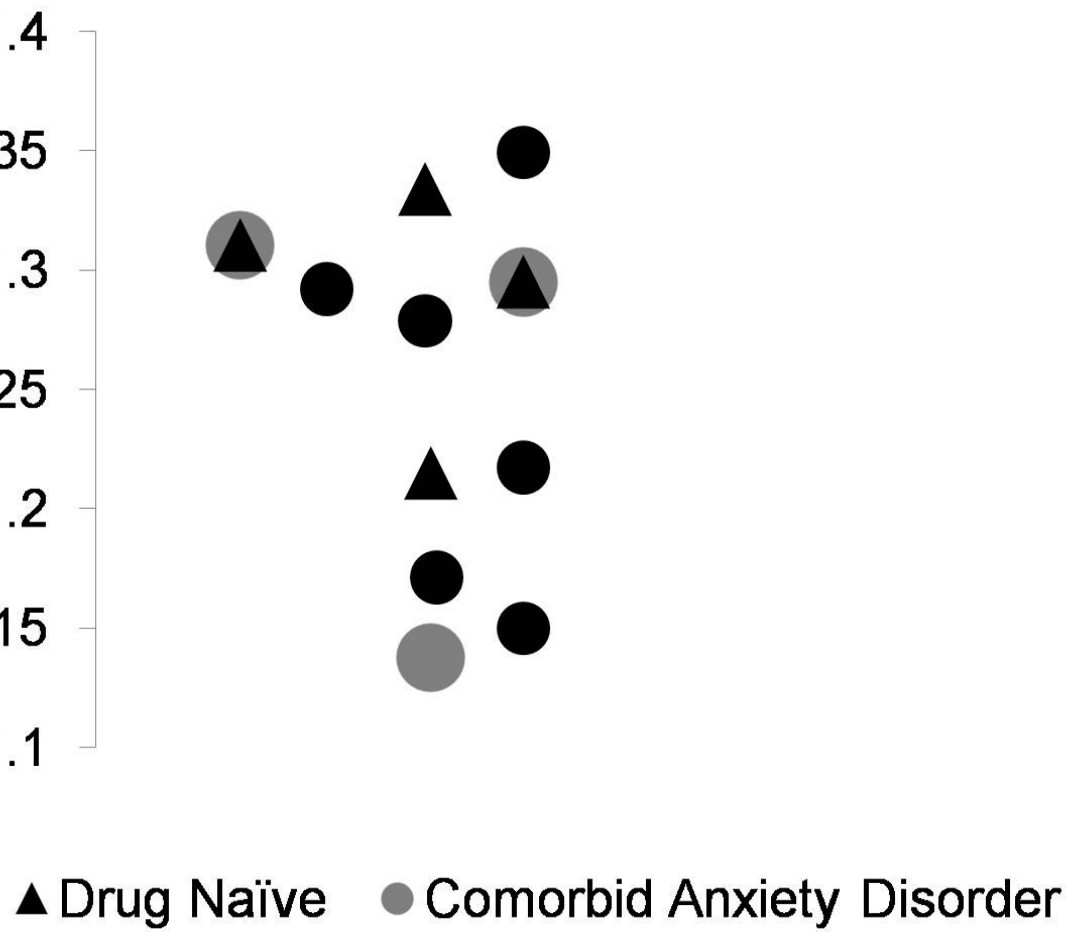

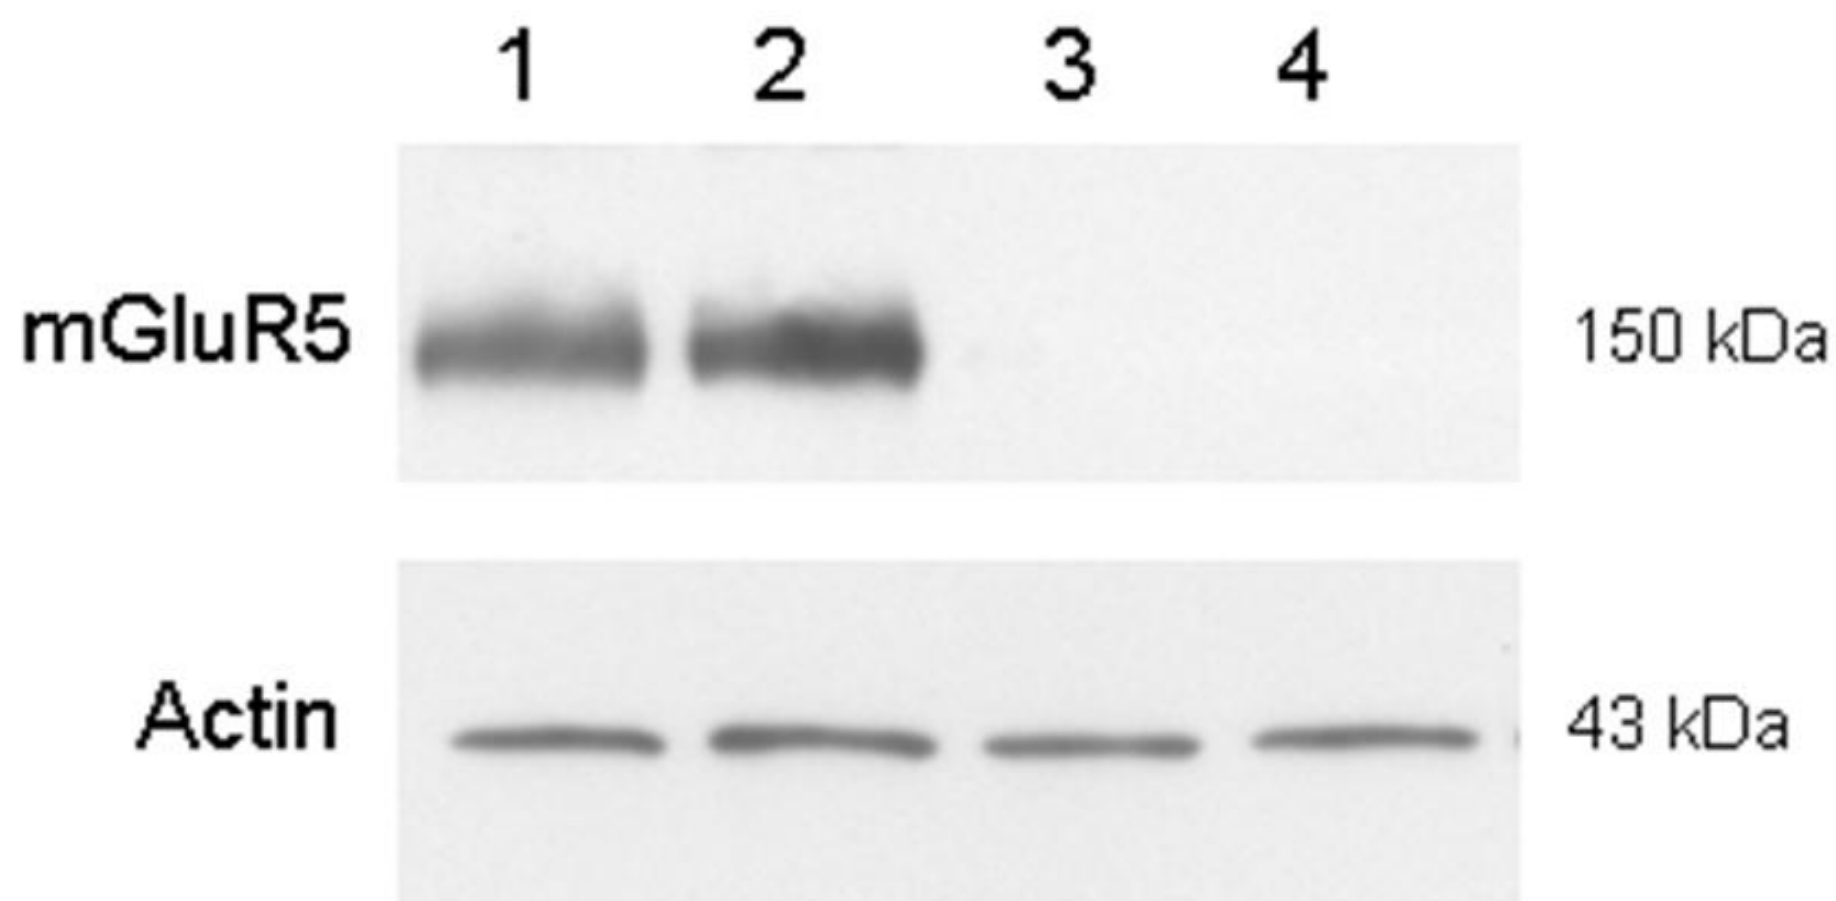

Supplement: NIHMS268016-supplement-SUPPL_FIGURES.pdf [file NIHMS268016-supplement-SUPPL_FIGURES.pdf]
